# Supplementary material for: Pueraria lobata and Daidzein Reduce Cytotoxicity by Enhancing Ubiquitin-Proteasome System Function in SCA3-iPSC-Derived Neurons
Source: PubMed Central journal article supplement (PMC6800904; doi:10.1155/2019/8130481), 2019-10-07
Supplement: 8130481.f1.pdf [file 8130481.f1.pdf]

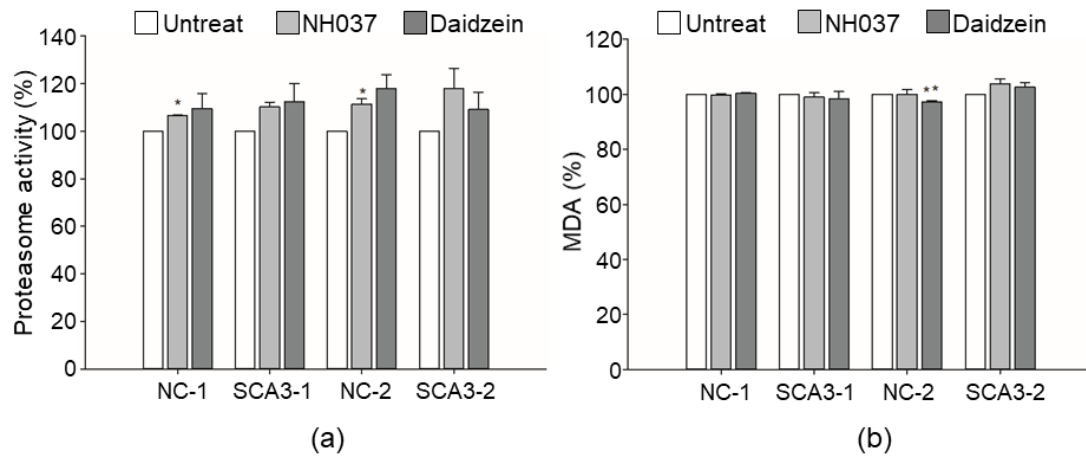

**SUPPLEMENTARY FIGURE 1:** Effects of NH037 and daidzein on proteasome function and oxidative stress in NC-, or SCA3-iPSC-derived neurons. (a) Proteasome activity of iPSC-derived neurons treated with 1 mg/ml NH037 or 50  $\mu$ M daidzein. The proteasome activity of untreated neurons was normalized as 100%. (b) Lipid peroxidation MDA assay was conducted to evaluate oxidative stress. MDA level of untreated neurons was normalized as 100%. Each experiment for each sample was performed in triplicate. *P* values, NH037 or daidzein treated vs. untreated, \**p* < 0.05 and \*\**p* < 0.01.

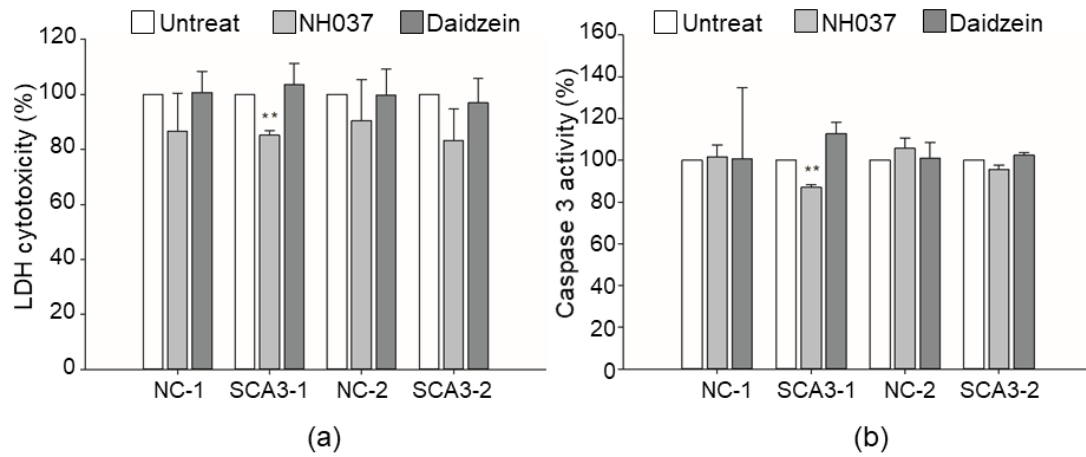

**SUPPLEMENTARY FIGURE 2:** The effects of NH037 and daidzein on cytotoxicity and caspase 3 activity in NC-, or SCA3-iPSC-derived neurons. (a) LDH assay in iPSC-derived neurons treated with 1 mg/ml NH037 or 50  $\mu$ M daidzein (untreated neurons was normalized as 100%). (b) Caspase 3 activity in iPSC-derived neurons treated with 1 mg/ml NH037 or 50  $\mu$ M daidzein. Untreated neurons were normalized as 100%. Each experiment for each sample was performed in triplicate. *P* values, NH037 or daidzein treated vs. untreated, \*\*  $p < 0.01$ .
